# Supplementary material
Source: PubMed Central journal article supplement (PMC3887713)
Supplement: molcell-33-2-173-9-supplementary.pdf [file molcell-33-2-173-9-supplementary.pdf]

## Supplement Fig. 1

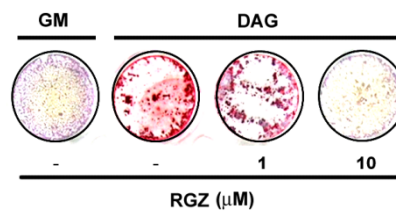

**Supplement Fig. 1.** Rosiglitazone treatment reduces mineralization in DAG-treated bone marrow cells. Adherent bone marrow cells were incubated in the presence of DAG with and without the indicated concentrations (0-10 mM) of rosiglitazone. After 2 weeks of incubation, the cells were stained with alizarin red S. GM, growth medium.
